# Supplementary material
Source: ML conference proceedings conference paper supplement (https://openreview.net/forum?id=xJ5CF1aOOX)

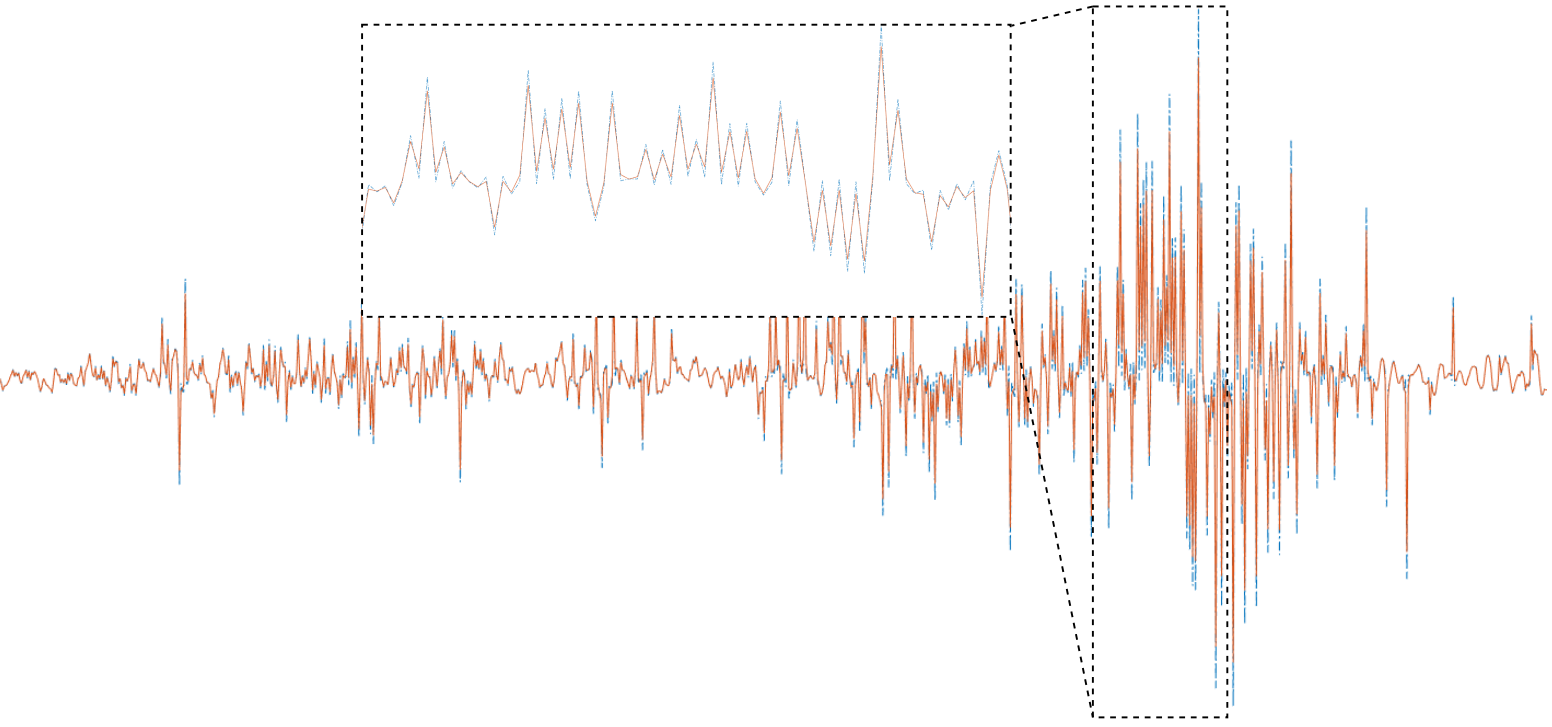

Supplement: supplementary_material [file attachment]

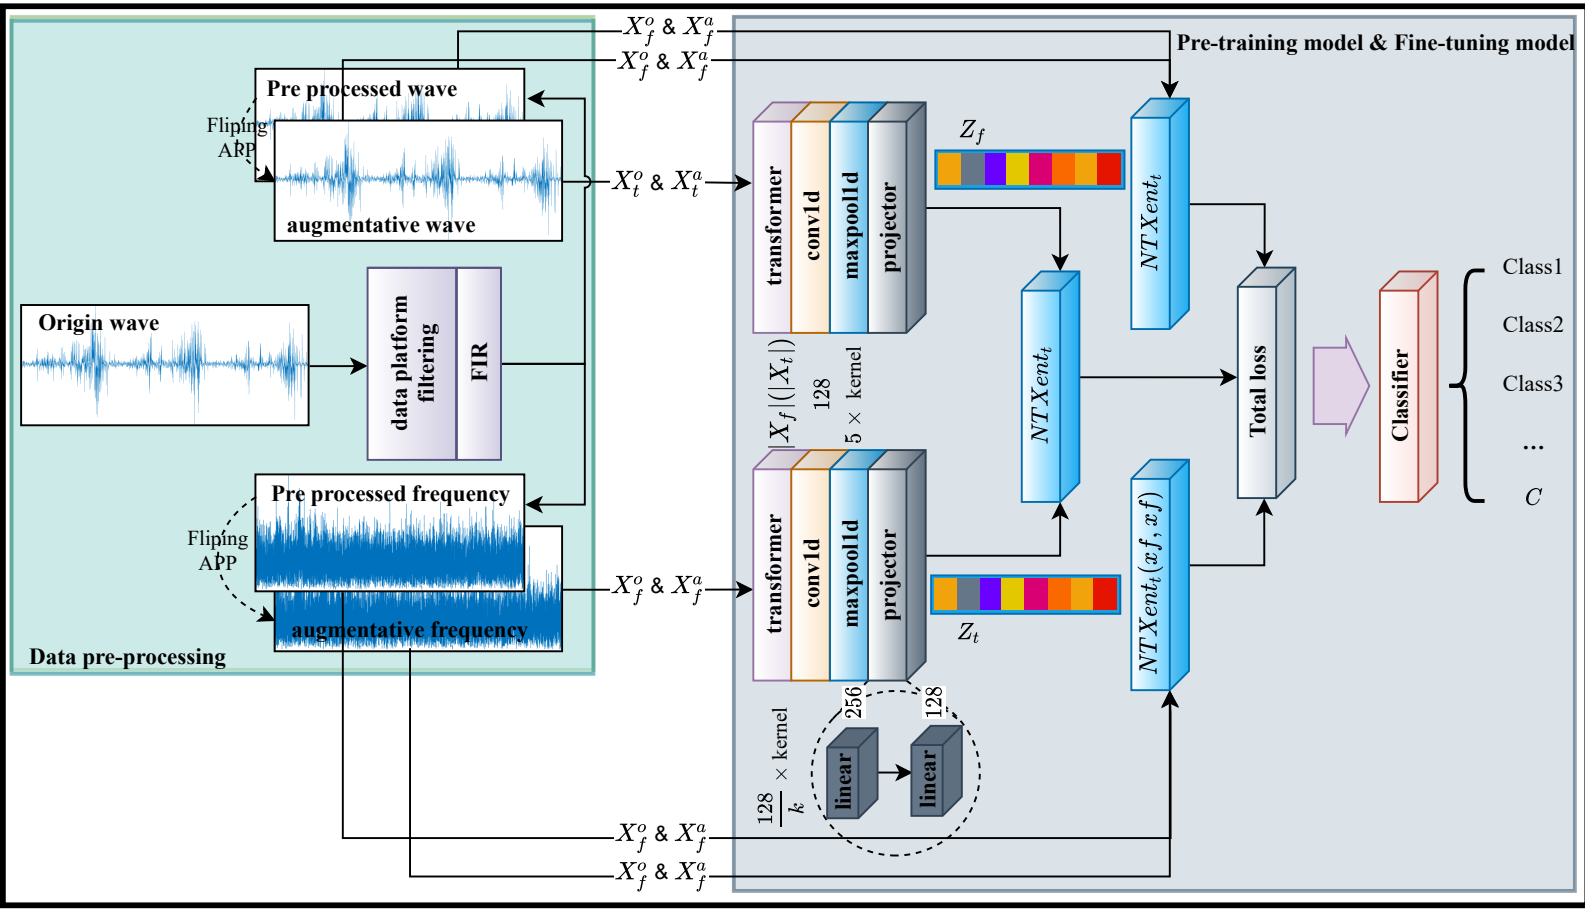

Supplement: supplementary_material [file attachment]

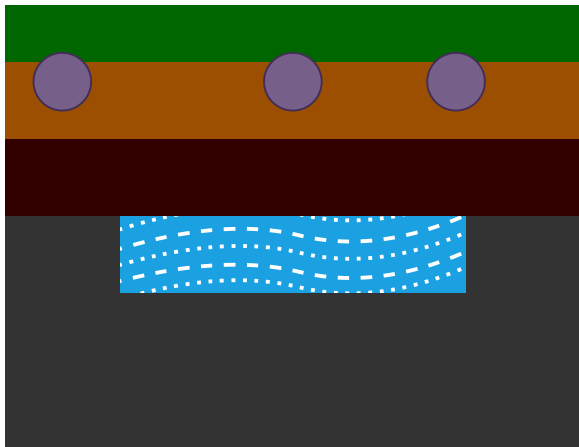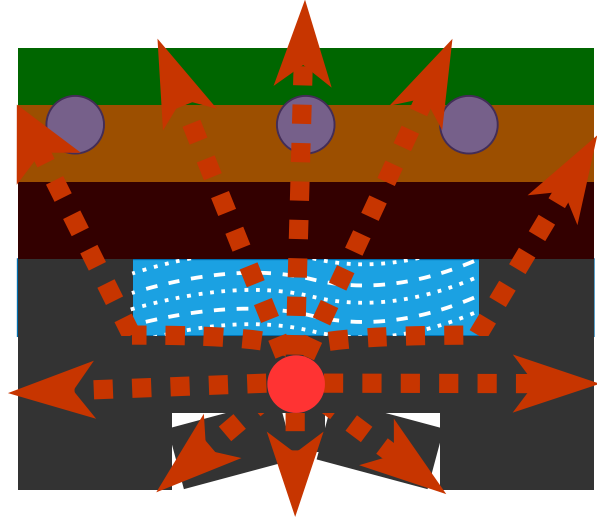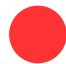

**Place of event occurrence**

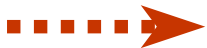

**Energy transport direction**

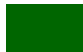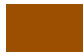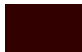

**soil**

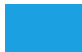

**water**

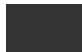

**Rock**

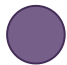

**Sensors**

Supplement: supplementary_material [file attachment]

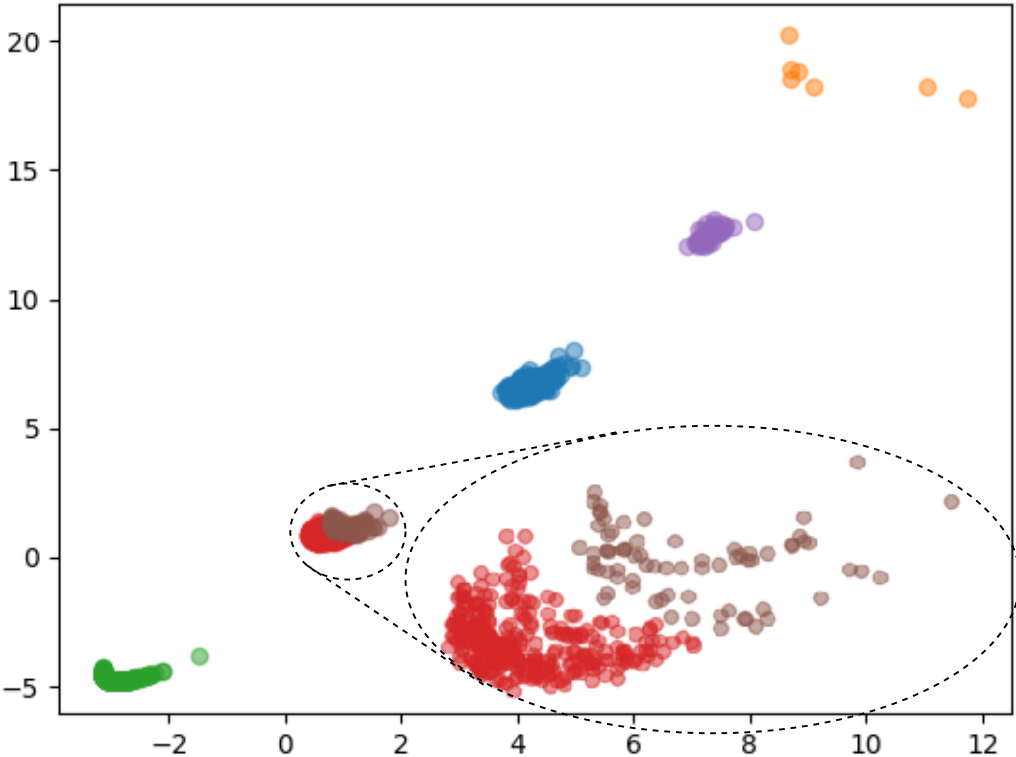

Supplement: supplementary_material [file attachment]

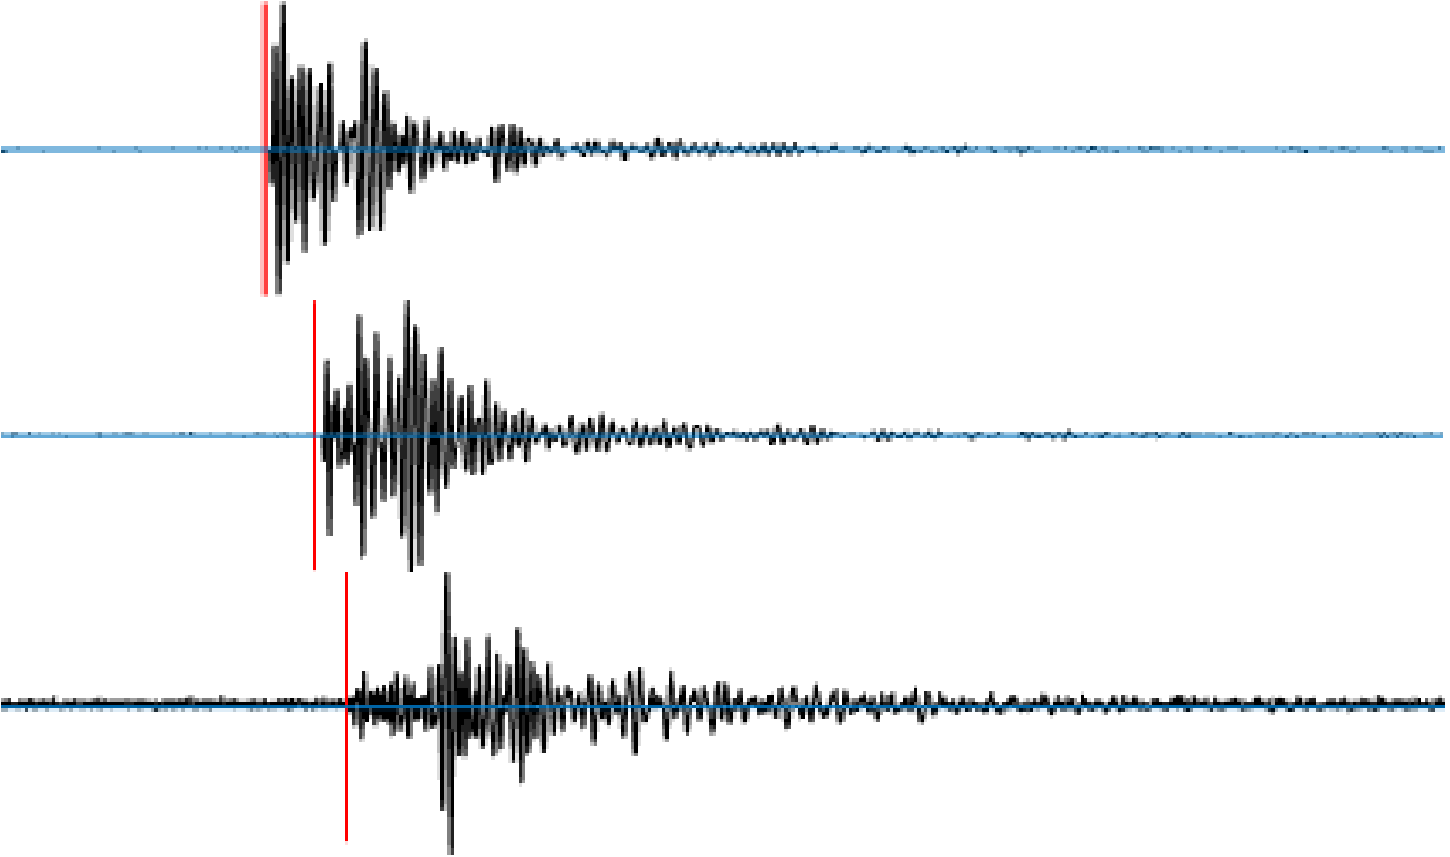

Supplement: supplementary_material [file attachment]

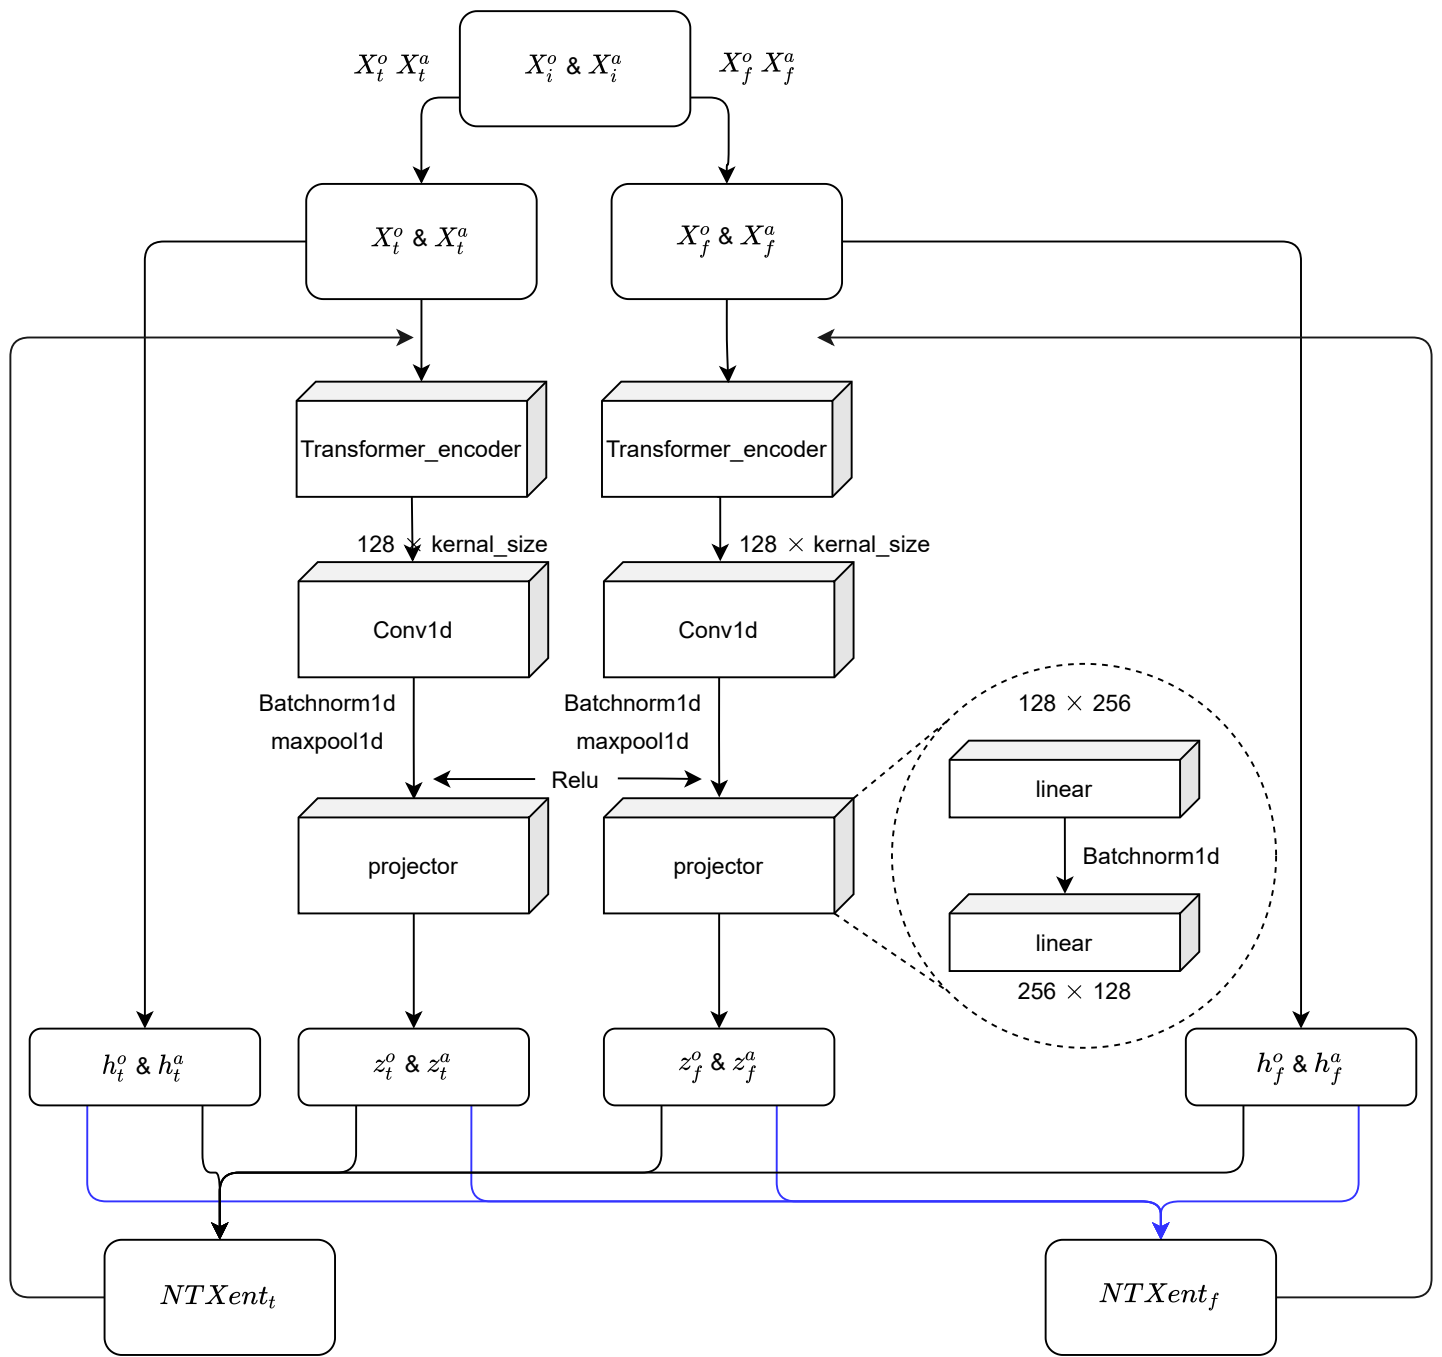

Supplement: supplementary_material [file attachment]
